# Supplementary material for: Control of Mycobacterium avium subsp. paratuberculosis load within infected bovine monocyte-derived macrophages is associated with host genetics
Source: Front Immunol. 2023 Feb 22;14:1042638. doi: 10.3389/fimmu.2023.1042638 (PMC9992791; doi:10.3389/fimmu.2023.1042638)
Supplement: Supplementary file 2 [file Table_1.xlsx]

## Sheet: Hoja1
Supplementary Table 1. The intracellular MAP load within infected MDMs and the extracellular expression of NO-, Gal9, EREG, and C3.
Animal ID	Gal9 (ng/ml)	EREG (pg/ml)	C3 (µg/ml)	NO- (pmol/µl)	MAP load	MAP load
					(log CFU 2h)	(log CFU 7d)
1	5.53424	320.194	84.9429	0.687638	3.70734	0.556735
2	5.49632	323.607	92.326	1.11196	3.63551	0.556735
3	6.04616	348.355	107.951	0.781893	3.60988	0.556735
4	5.65748	321.047	92.1543	0.208399	3.50106	0.556735
5	5.65748	311.233	97.9921	1.06111	3.49067	0.556735
6	5.09816	333.847	90.7807	0.488533	3.69199	1.08776
7	5.97032	298.433	91.8109	0.496555	3.66411	1.55464
8	5.80916	349.208	98.6789	0.106955	3.83935	2.32109
9	5.38256	299.286	86.1448	0.414507	3.5106	2.36979
10	5.97032	349.635	95.4166	0.0629615	3.5953	2.43464
11	5.43944	352.621	89.4071	0.858235	3.76598	2.49048
12	5.57216	296.3	93.8713	0.258505	4.06815	2.49253
13	5.42996	349.635	92.4977	0.683034	3.73494	2.50175
14	5.42048	306.967	93.8713	0.942507	3.73494	2.50175
15	5.2688	251.072	99.7091	1.42291	4.86624	2.77599
16	5.40152	258.325	95.4166	0.643309	4.69589	2.79955
17	5.38256	234.858	99.7091	0.649172	4.86609	2.82015
18	5.73332	251.072	118.768	0.515953	4.47058	2.86852
19	5.70488	280.939	116.021	0.715785	4.75044	2.89256
20	5.52476	266.005	91.1241	0.576127	4.51944	2.8975
21	5.61956	275.392	110.698	0.957462	4.72753	2.91601
22	5.40152	236.564	100.911	0.586895	4.80997	2.91946
23	5.48684	227.604	84.0844	0.36974	4.72151	2.93792
24	5.73332	223.764	90.2656	0.882296	4.9746	2.94884
25	5.19296	241.685	89.5788	0.45561	4.62974	2.96435
26	5.37308	209.257	93.5279	1.00631	4.96886	2.97128
27	5.73332	332.567	103.487	0.260347	3.73475	2.9874
28	5.58164	216.084	92.1543	0.767497	4.862	3.00287
29	5.6954	329.154	87.6901	0.0672079	3.71873	3.08484
30	5.63852	280.512	116.879	1.07648	4.84177	3.25625
31	6.34952	310.807	113.273	0.763738	4.75708	3.27494
32	5.48684	253.205	102.113	0	4.57399	3.27704
33	6.43484	281.366	123.404	0.714586	4.875	3.29157
34	5.5532	258.752	109.839	0.780921	4.87477	3.32114
35	5.6954	250.218	109.324	0.554499	4.67905	3.32126
36	5.43944	246.805	94.9015	0.804596	4.82658	3.32669
37	5.28776	237.844	103.658	0.425755	4.83087	3.33493
38	5.86604	271.552	102.456	0.502948	4.75112	3.35993
39	5.885	277.099	125.636	0.552828	4.79373	3.36439
40	5.4584	263.872	106.234	0.688181	4.52552	3.39861
41	5.77124	359.875	105.719	0.00782839	4.6324	3.41447
42	6.43484	410.223	104.86	0	4.73581	3.4421
43	6.5486	317.207	109.668	0	4.66828	3.4456
44	5.63852	274.539	112.072	0	4.50731	3.49858
45	5.58164	312.94	99.7091	0.0585589	5.05532	3.56734
46	6.01772	329.581	99.5374	0.112482	4.80755	3.57516
47	5.95136	365.848	116.192	0	4.88899	3.58882
48	6.68132	345.795	122.374	0	4.90726	3.60704
49	6.34004	333.847	111.213	0	4.93382	3.62287
50	5.99876	249.792	89.2354	0.174813	5.43078	3.6559
51	6.03668	273.686	120.313	0	4.81119	3.67612
52	5.9324	313.794	120.313	0.00824191	4.94859	3.74425
53	5.44892	251.925	91.4675	0	5.44344	3.85406
54	5.95136	275.819	102.285	0.138462	5.1985	3.88291
55	6.42536	287.766	117.051	0.012635	5.12278	3.89189
56	4.99388	283.499	110.355	0.0588332	5.09893	3.94765
57	5.29724	374.809	107.607	0	4.90153	3.98967
58	5.40152	336.408	105.204	0	5.01627	4.02058
59	5.21192	364.142	101.769	0.0685449	5.4118	4.04963
60	5.19296	268.139	105.89	0.00611772	5.46852	4.07235
61	5.9798	343.234	100.396	0	5.07147	4.13424
62	7.01312	323.607	109.839	0.204438	ND	ND
63	6.91832	301.846	106.749	0.675871	ND	ND
64	6.62444	278.379	112.415	0.42771	ND	ND
65	6.57704	286.059	110.87	0.443238	ND	ND
66	6.51068	294.593	113.102	0.0979131	ND	ND
67	6.4538	284.779	108.122	0.423953	ND	ND
68	6.36848	299.286	100.739	0.486017	ND	ND
69	5.79968	257.045	96.4468	0.318154	ND	ND
70	5.75228	254.485	104.86	0.330013	ND	ND
71	5.72384	303.98	117.909	0.575474	ND	ND
72	5.59112	292.886	115.849	0.491842	ND	ND
73	5.52476	292.46	104.86	0.30394	ND	ND
74	5.5058	273.686	105.547	0.808148	ND	ND
75	5.24984	254.485	107.264	0.619921	ND	ND
